# Supplementary material for: Biomineralization-inspired mineralized hydrogel promotes the repair and regeneration of dentin/bone hard tissue
Source: Springer Nature journal article supplement (doi:10.1038/s41536-023-00286-3), 2023-02-25
Supplement: MOESM1 [file 41536_2023_286_MOESM1_ESM.pdf]

---

# Supplementary Materials

## **Biom mineralization-inspired mineralized hydrogel promotes the repair and regeneration of dentin/bone hard tissue**

**Bo Wen<sup>1, 2, 3, 4</sup>, Yuguo Dai<sup>1, 2, 3</sup>, Xue Han<sup>1, 2, 3</sup>, Fangjun Huo<sup>1,2</sup>, Li Xie<sup>1,2</sup>, Mei Yu<sup>1,2</sup>, Yuru**

**Wang<sup>1,2,3</sup>, Ning An<sup>1,2,3</sup>, Zhonghan Li<sup>1,6</sup>, Weihua Guo<sup>1,2,3,5\*</sup>**

### **Corresponding author:**

\*Corresponding author, Department of Pediatric Dentistry, West China College of Stomatology, Sichuan University, No.14, 3rd Section, Renmin South Road, Chengdu 610041, PR China; Yunnan Key Laboratory of Stomatology, The Affiliated Hospital of Stomatology, School of Stomatology, Kunming Medical University, Kunming, Yunnan, PR China. Tel/fax: +86 28 8550 3499. Email address: guoweihua943019@163.com

---

**Supplementary table 1** The primer sequences used for RT-qPCR

| Gene   | Forward sequence/reverse sequence                                     |
|--------|-----------------------------------------------------------------------|
| GAPDH  | 5` - TCAGCAATGCCTCCTGCAC-3`/<br>5` - TCAGCAATGCCTCCTGCAC-3`           |
| DMP-1  | 5` - AGAAGCGAGCTTGATGACAACAA-3`/<br>5` - TGGACTCACTGCTGGGACCATCTAC-3` |
| ALP    | 5` - ACATTCCCACGTCTTCACATTT-3`/<br>5` - AGACATTCTCTCGTTCACCGCC-3`     |
| DSPP   | 5` - ATATTGAGGGCTGGAATGGGGA-3`/<br>5` - TTTGTGGCTCCAGCATTGTA-3`       |
| RUNX-2 | 5` - ATGAAATGCTGGAGTGATGTGG-3`/<br>ATGAAGCCTGGCGATTTAGAGT-3`          |
| OPN    | 5` - CAGTTGTCCCCACAGTAGACAC-3`/<br>5` - GTGATGTCCTCGTCTGTAGCATC-3`    |
| COL-I  | 5` - GAGGGCCAAGACGAAGACATC-3`/<br>5` - CAGATCACGTCATCGCACAAAC-3`      |

---

---

**Supplementary table 2** The antibodies list

| Antibody                            | Provide supplier           | Catalogue numbers | dilutions |
|-------------------------------------|----------------------------|-------------------|-----------|
| ALP                                 | HUABIO (China)             | ET1601-21         | 1:1000    |
| RUNX-2                              | HUABIO (China)             | ET1612-47         | 1:1000    |
| OPN                                 | HUABIO (China)             | 0806-6            | 1:1000    |
| COL-I                               | HUABIO (China)             | ET1609-68         | 1:1000    |
| GAPDH                               | HUABIO (China)             | ET1601-4          | 1:5000    |
| DMP-1                               | Novus Biologicals<br>(USA) | NBP1-45525        | 1:1000    |
| CD68                                | Abcam (UK)                 | ab125212          | 1:200     |
| Vimentin                            | Abcam (UK)                 | ab92547           | 1:200     |
| CD163                               | Abcam (UK)                 | ab182422          | 1:200     |
| DSPP                                | Zen Bioscience<br>(China)  | 508413            | 1:1000    |
| Goat anti-rabbit IgG-<br>HRP        | Zen Bioscience<br>(China)  | 511203            | 1:5000    |
| Goat anti-mouse<br>IgG-HRP          | Zen Bioscience<br>(China)  | 511103            | 1:5000    |
| Alexa FluoR 488<br>Goat anti-Mouse  | Invitrogen (USA)           | A31627            | 1:200     |
| Alexa FluoR 555<br>Goat anti-Rabbit | Invitrogen (USA)           | A31627            | 1:200     |

---

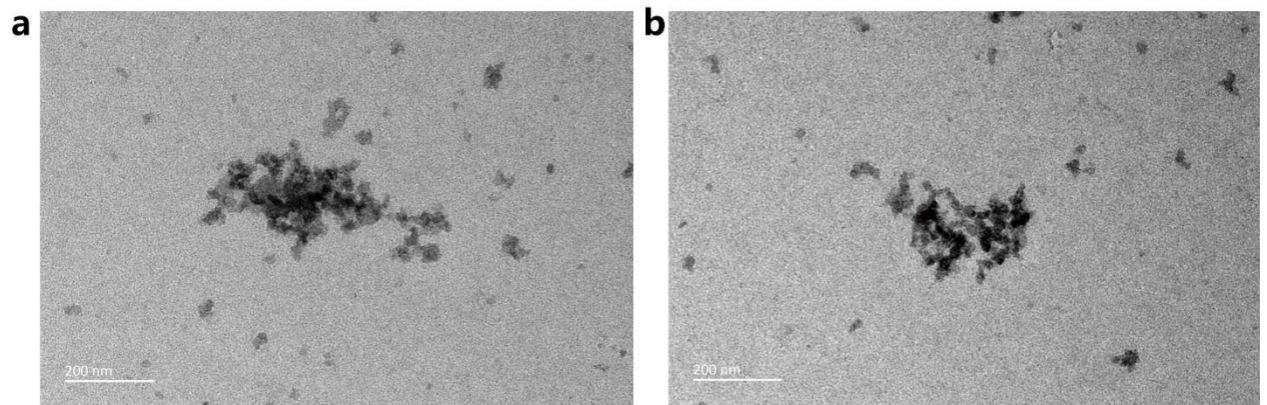

**Supplementary Figure 1** TEM for PAA-CMC-ACP. Transmission electron microscopy (TEM) demonstrated black high-density particles located within PAA-CMC, which was similar to those reported in the literature about amorphous calcium phosphate (ACP).

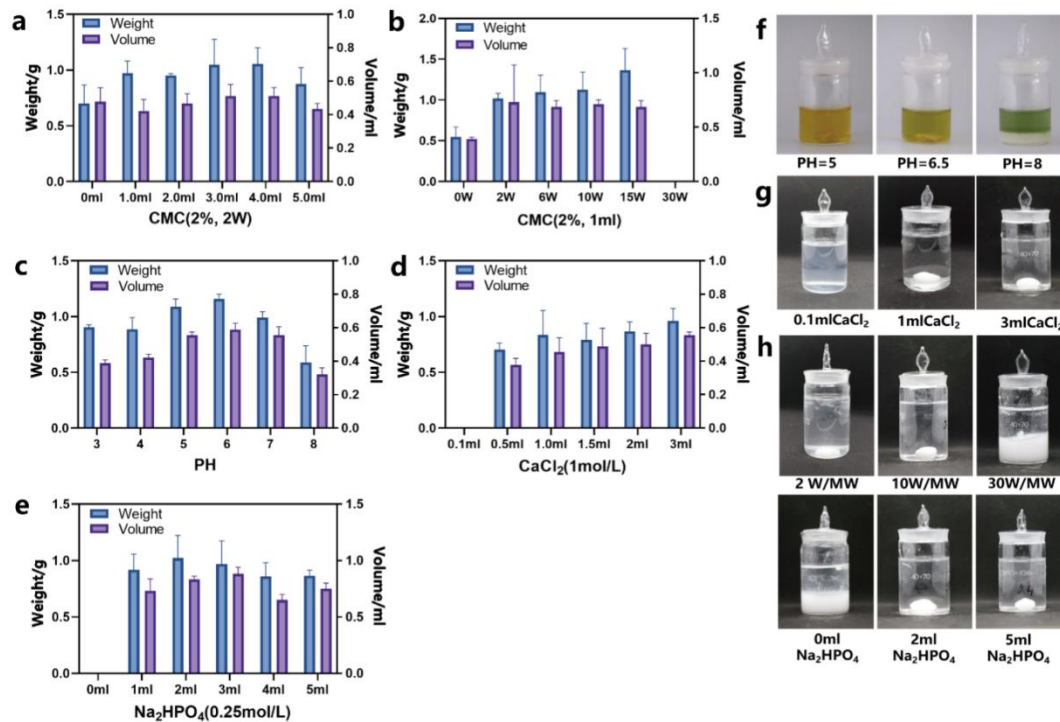

**Supplementary Figure 2** Mass and volume changes after adjusting material composition and preparation conditions. It can be found that when other preparation conditions are consistent, the hydrogel material is difficult to form when  $\text{PH} \geq 7.5$ . Similarly, when the molecular weight of CMC is 30 W, the formation is an unformed flocculate, just like the control group without  $\text{Na}_2\text{HPO}_4$ . At the same time, a certain amount of  $\text{CaCl}_2$  ( $\geq 0.5 \text{ mL}$ ,  $1 \text{ mol/L}$ ) can make the gel polymerize and settle. **a–e** Optical pictures of material preparation system with different molecular weight of CMC (**a**), different content of CMC (**b**), different PH (**c**), different content of  $\text{CaCl}_2$  (**d**), and different content of  $\text{Na}_2\text{HPO}_4$  (**e**). **f–h** Partial display of the preparation of hydrogels with different components.

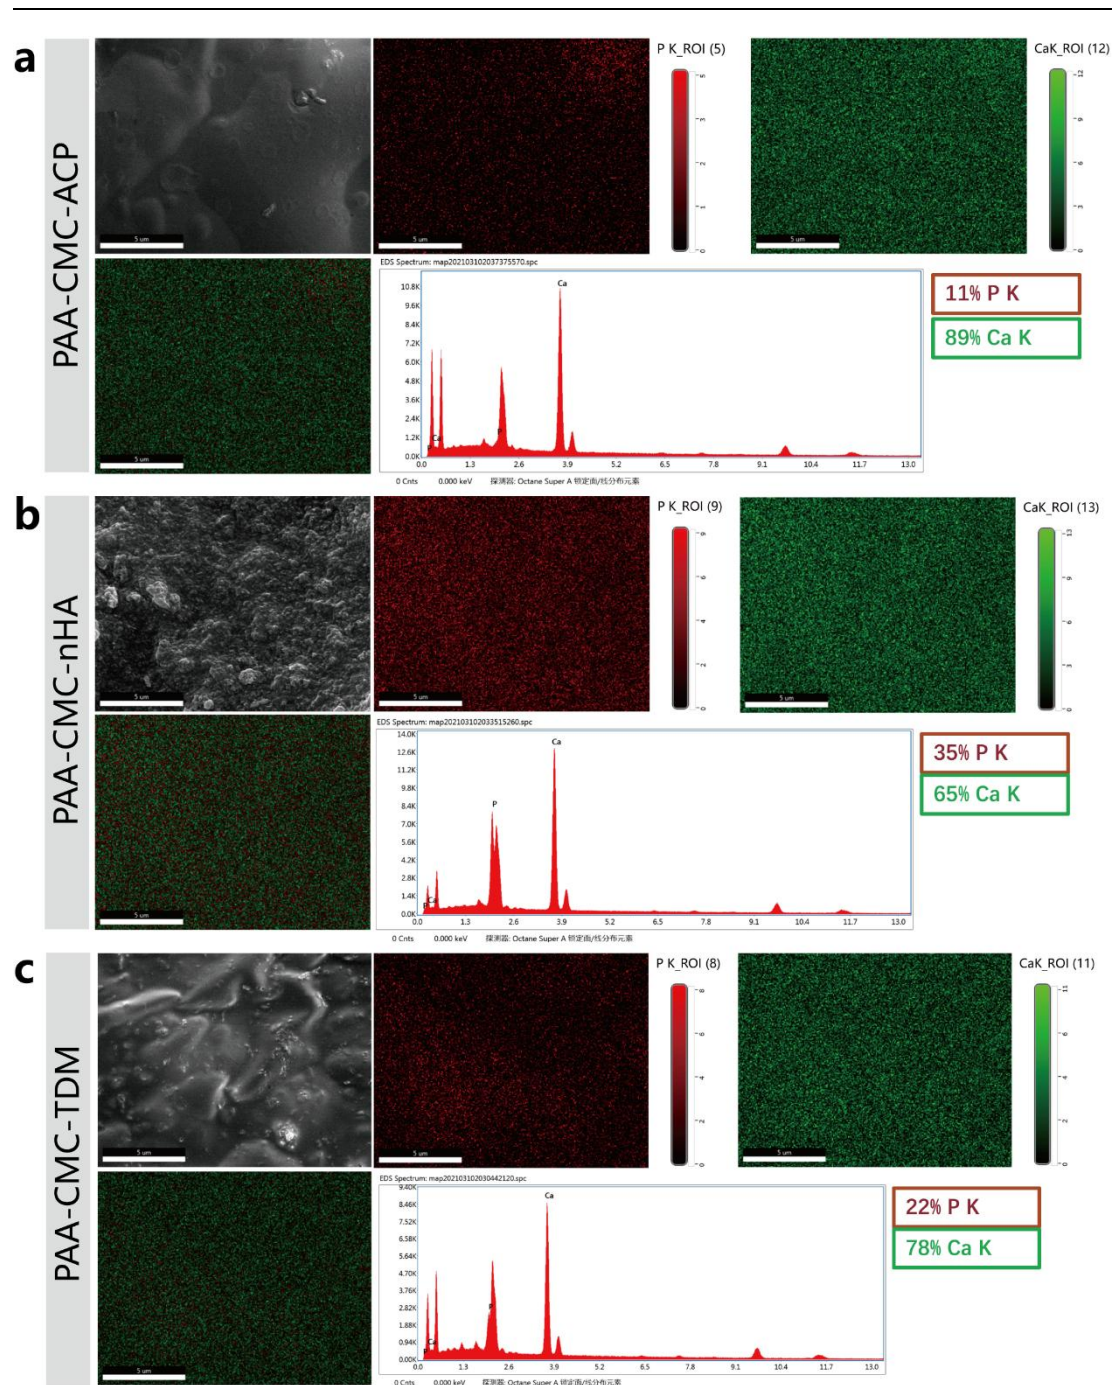

**Supplementary Figure 3** SEM analysis coupled with EDX mapping (STEM-EDX) of the hydrogel. SEM analysis coupled with EDX mapping (STEM-EDX) displays the content and distribution of calcium and phosphorus ions on the hydrogel surface. **a** PAA-CMC. **b** PAA-CMC-nHA. **c** PAA-CMC-TDM.



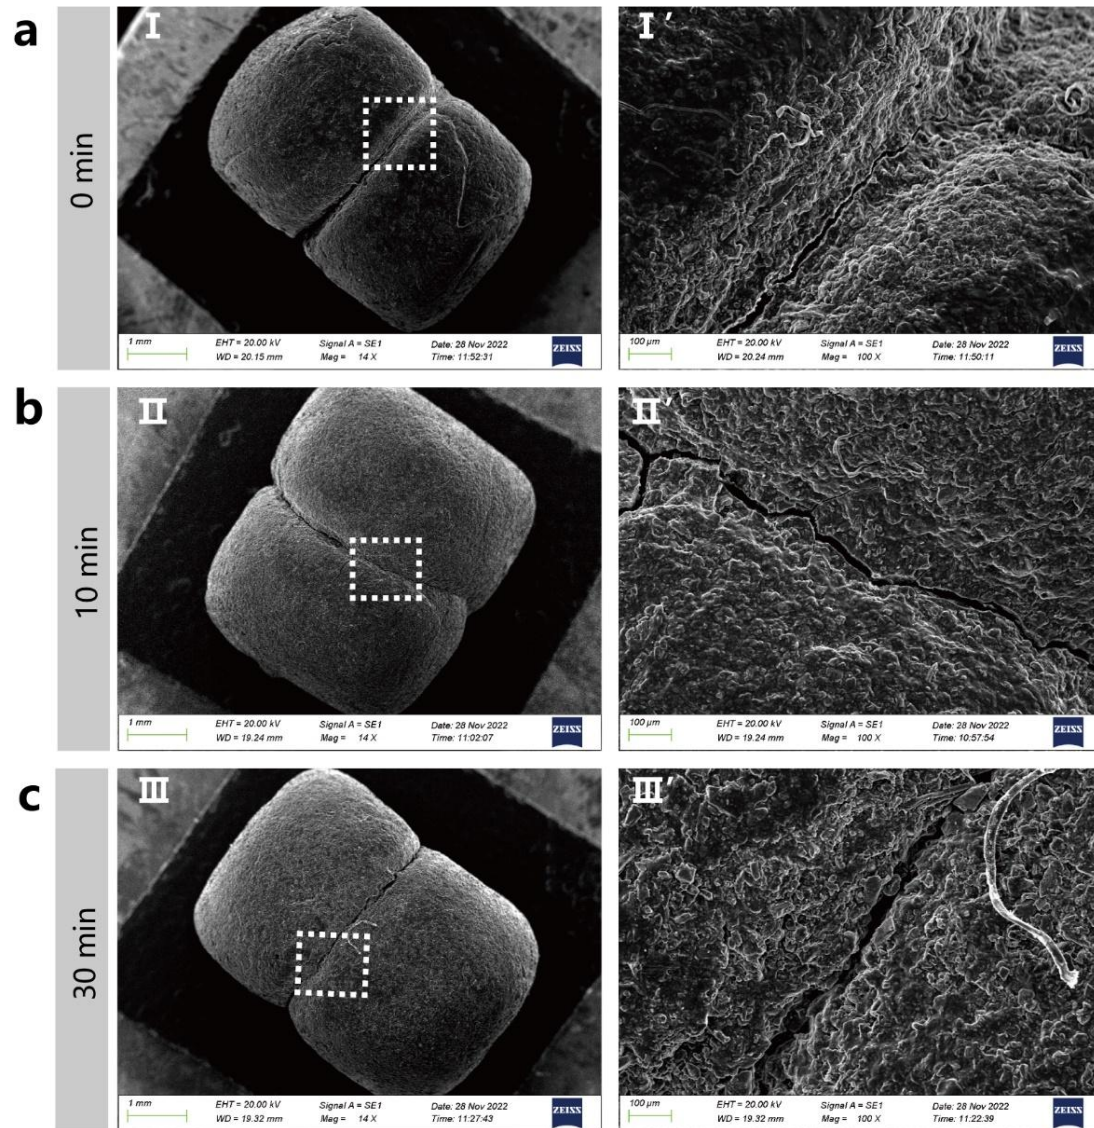

**Supplementary Figure 4** SEM analysis of hydrogel self-healing experiment.

The separated hydrogels were reassembled and freeze-dried in the initial stage **(a)**, recombinant 10 min **(b)** and recombinant 30 min **(c)**, respectively, and the interface of the recombination was observed by SEM. Scale bar, (I, II, III): 1 mm; (I', II', III'): 100  $\mu$ m.

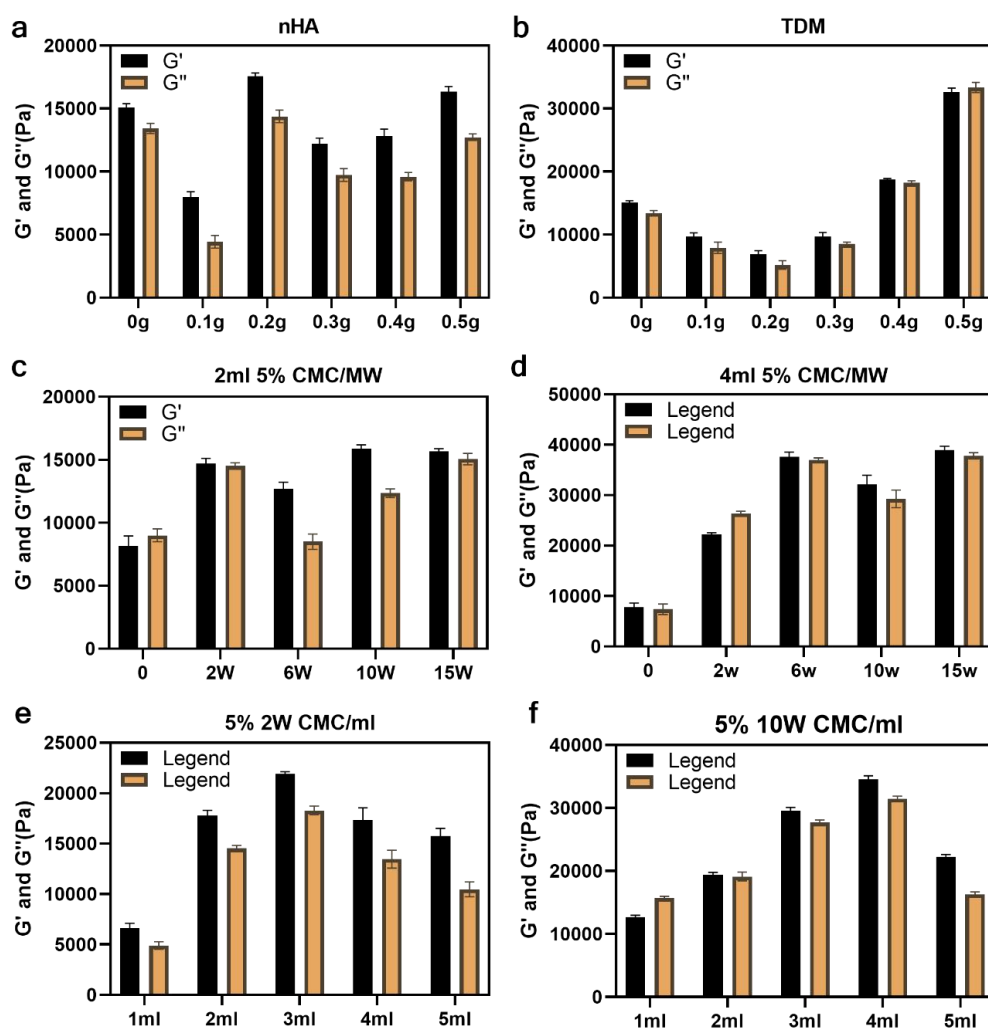

**Supplementary Figure 5** Changes of material storage modulus ( $G'$ ) and loss modulus( $G''$ ) after adjusting material composition. **a–b** Under the condition of 5% CMC (2W MW, 2 mL), the amount of TDM/nHA is adjusted from 0.1 g-0.5 g. **c–d** Under the condition of 5% CMC (**c** 2 mL, **d** 4 mL) and 0.1 g TDM, adjusting CMC molecular weight (2W, 6W, 10W, 15W). **e–f** Under the condition of 5% CMC (**e** 2W MW, **f** 10W MW) and 0.1 g TDM, adjusting the content of CMC (1 mL–5 mL).



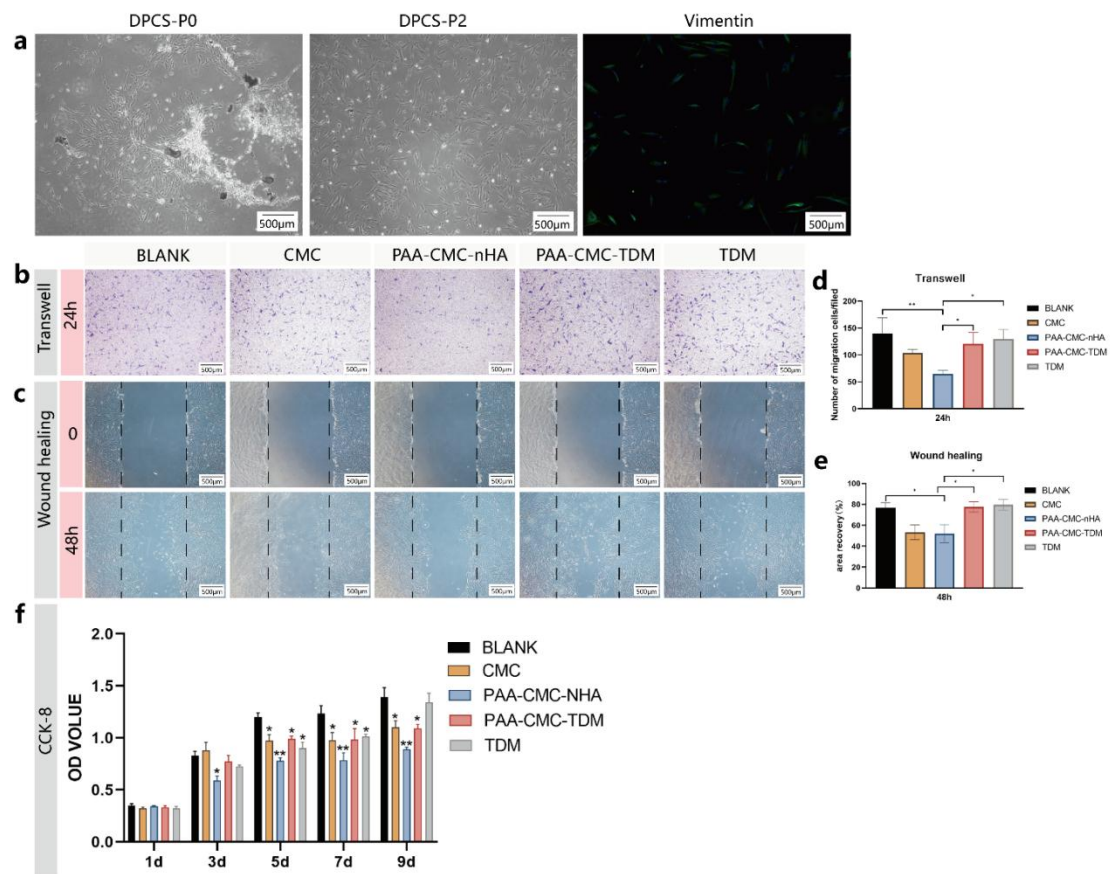

**Supplementary Figure 6** Effect of hydrogel on the proliferation and migration capacity of DPCs. **a** The primary DPCs were obtained with the typical morphologic characteristics of mesenchymal cells in fibroblastic and spindle-shaped; hDPCs were positive for Vimentin. **b** Transwell migration assay with the extract of TDM, CMC and mineralized hydrogels. **c** Cell migration (scratch) assay for 48 h with the extract of TDM, CMC and mineralized hydrogel. **d** Quantification of transwell migration assay data. **e** Quantified cell migration (scratch) assay data. **f** Proliferation of DPCs after treatment with the extract of TDM, CMC and mineralized hydrogels, as measured by CCK-8. Error bars indicate standard deviation ( $n = 3$ ); \* $p < 0.05$ , \*\* $p < 0.01$ , and \*\*\* $p < 0.001$  (two-way ANOVA). Scale bar, (a, b, c): 500  $\mu\text{m}$ .

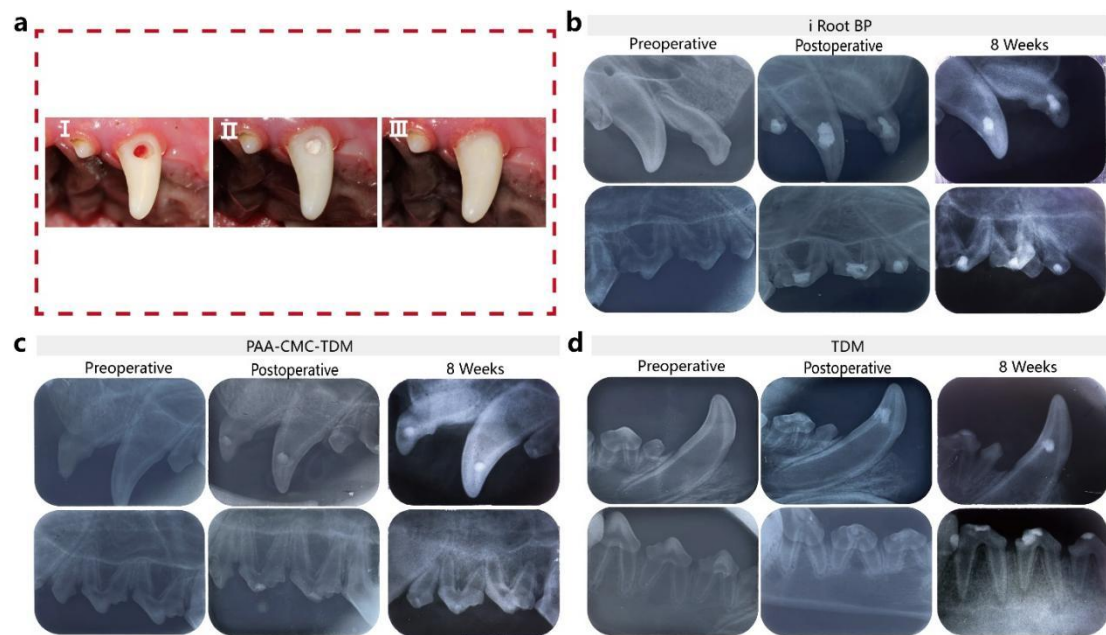

**Supplementary Figure. 7** Construction of dental pulp defect model and X-ray images before, after and 8 weeks after direct pulp capping of Beagle dogs pulp repair model. **a** The preparation process of Beagle dogs dental pulp defect model, pulp cavity exposure (I), material filling (II), closure of the defect (III). **b** i Root BP plus, **c** PAA-CMC-TDM, **d** TDM. It can be found that the experimental tooth filling materials of each group were intact and not separated, and no obvious internal and external root absorption and other abnormalities were found.

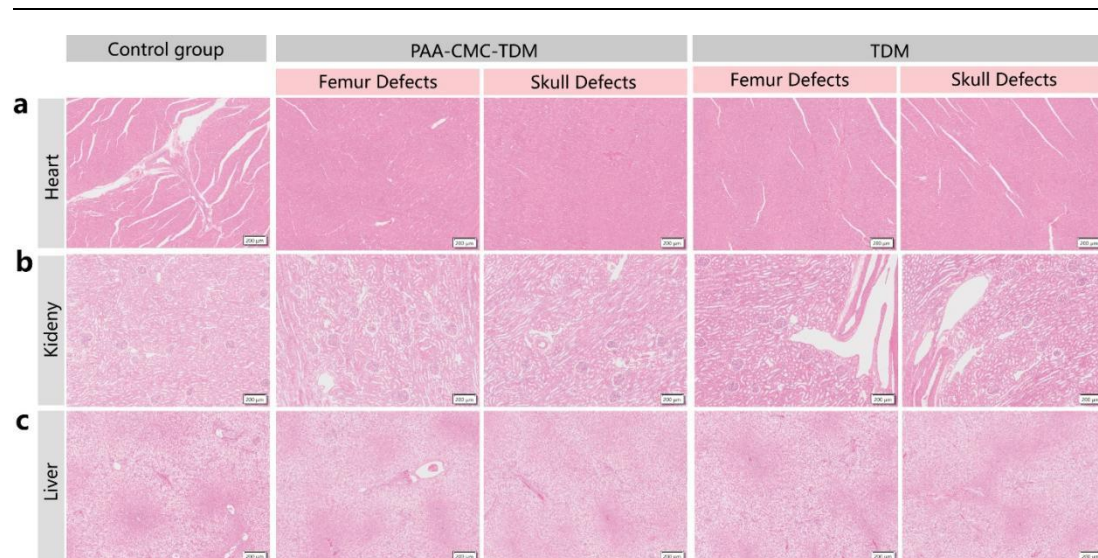

**Supplementary Figure 8** HE staining of visceral tissues and organs about PAA-CMC-TDM implanted into the skull and femur defects of rats for 6 weeks. **a** HE staining of myocardial tissue. **b** HE staining of kidney tissue. **c** HE staining of liver tissue. Scale bar, (a, b, c): 200  $\mu$ m.

---

Western Blot Analyses of odontogenic  
differentiation marker for 7 days

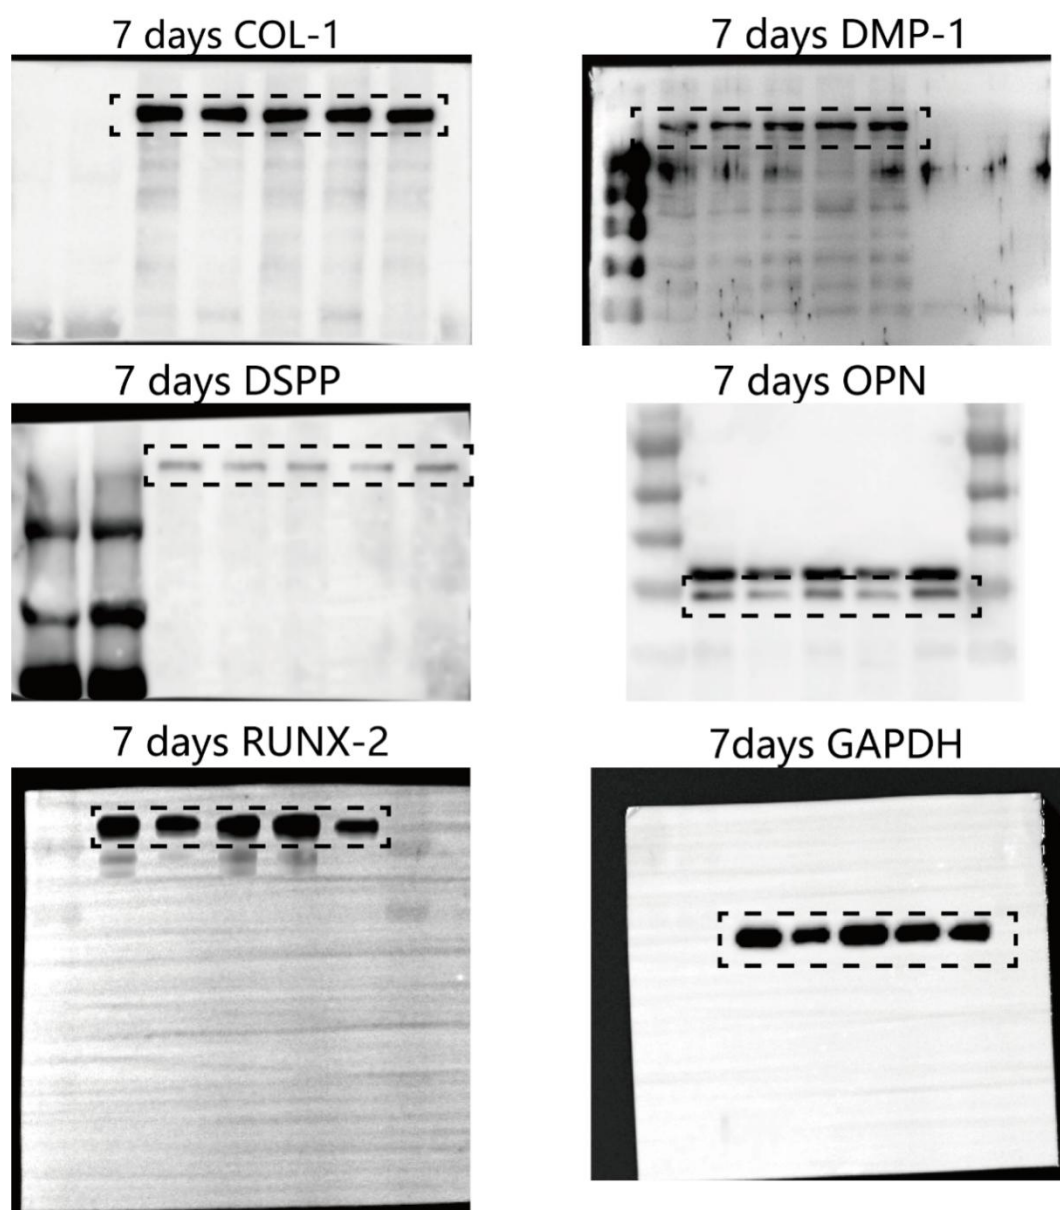

**Supplementary Figure 9** The uncropped scans of the western blot Analyses of odontogenic differentiation marker blots for 7 days.

---

Western Blot Analyses of odontogenic  
differentiation marker 14days

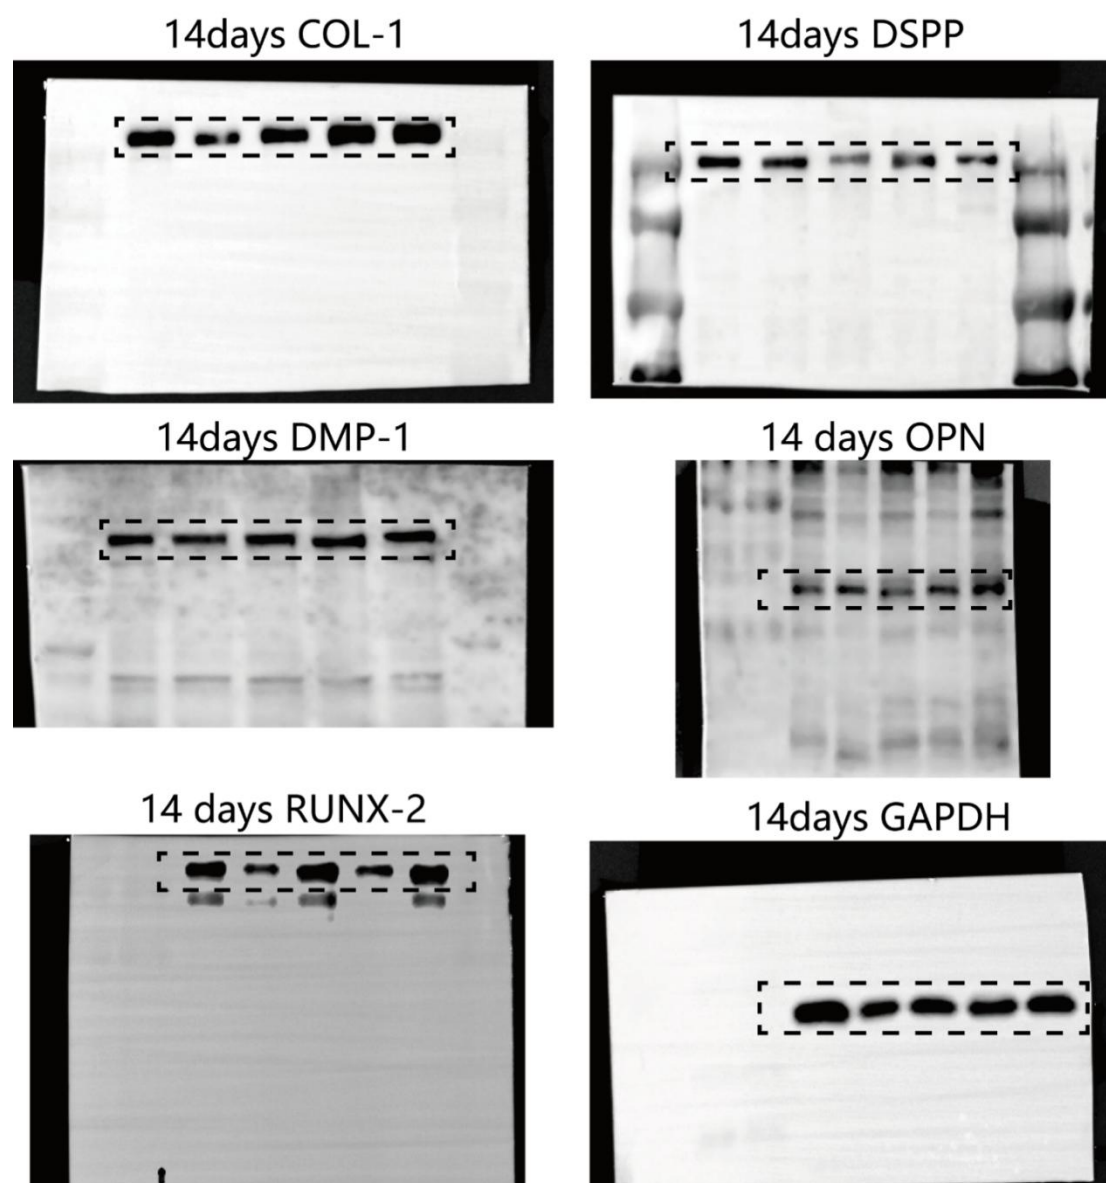

**Supplementary Figure 10** The uncropped scans of the western blot Analyses of odontogenic differentiation marker blots for 14 days.



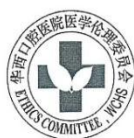

NO: WCHSIRB-D-2021-414

Research Ethics Committee of West China Hospital of Stomatology  
Resolution Paper of Scientific Experiments Ethical Review

Experiment title: Biom mineralization-inspired mineralized hydrogel promotes the repair and regeneration of dentin/bone hard tissue.

Correlative content: A

(A. Animal experiment or specimens. B. Specimens taken from human body. C. Embryonic stem cells)

Dear Mr. Weihua Guo

The Research Ethics Committee of State Key Laboratory of Oral Diseases reviewed your research project titled above and made the resolution as the following item 1:

1. The experiment involved ethical part conforms to the scientific experiment ethical requirements, it is agreed to implement the experiment.
2. The experiment involved ethical part basically conforms to the scientific experiment ethical requirements, but the following relevant contents should be modified:
3. The experiment involved ethical part does not conform to the scientific experiment ethical requirements, it is not agreed to implement the experiment.

Research Ethics Committee  
West China Hospital of Stomatology  
Sichuan University

Date of Issue : 8/5/2021

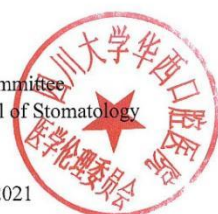

**Supplementary Figure 11** The West China Hospital of Stomatology Institutional  
Review Board, WCHSIRB-D-2021-414.



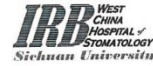

## Institutional Review Board

West China Hospital of Stomatology  
Sichuan University  
No.14, 3<sup>rd</sup> Section, Renminnan Rd.  
Chengdu, Sichuan 610041, China  
Telephone: +86-28-85503684  
Facsimile: +86-28-85503684  
E-mail: hxkqlunli@163.com

To: **Weihua Guo**  
West China Hospital of Stomatology, Sichuan University

### Study Title:

Biomaterialization-inspired mineralized hydrogel promotes the repair and regeneration of dentin/bone hard tissue

Approval Date: 8/5/2021 Expiration Date of Approval: 8/4/2022

Submission type: Initial Approval type: Quick review

IRB Reference Number: WCHS-IRB-CT-2021-362 (Please quote this ref # on all correspondence)

Following files were reviewed:

|                               |          |
|-------------------------------|----------|
| Ethical Application Form      | 20210805 |
| Protocol                      | 20210805 |
| Consent Form                  | 20210805 |
| Participant Information Sheet | 20210805 |

The West China Hospital of Stomatology Institutional Review Board (WCHSIRB) has formally APPROVED this projects for the period indicated, in accordance with regulations or guidelines quoted below:

1. Quality Management Regulation for Good Clinical Practice By Food and Drug Administration, PRC 2003
2. Ethical Approval Review Methodology for Biomedical Research, PRC 2007
3. Management Regulation for Medical Technology Application By Ministry of Public Health, PRC 2009
4. The principle for ethical review of clinical trail. By Food and Drug Administration, PRC 2010
5. The Declaration of Helsinki(2008)

### Investigators' Responsibilities:

If you are unable to complete the research activities before the expiration date, it is the Principal Investigator's responsibility to submit an application for extension and obtain approval before the expiration date. The written application for extension should be received by the WCHSIRB at least 30 days before the expiration date.

Any changes to any aspect of this study should be reported to IRB and obtain IRB approval before they can be implement. Any unanticipated problem, incompliance to protocol serious adverse event, should be reported to IRB.

Yours sincerely

Chairmen of WCHSIRB

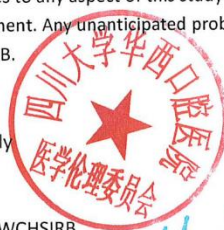

Wei Li

**Supplementary Figure 12** The West China Hospital of Stomatology Institutional  
Review Board, WCHSIRB-CT-2021-362

### Proof of copyright

1. The copyright of this cover image belongs to Hangzhou Drawing Scientific Research Co., LTD and the author of the article(Bo Wen, Yuguo Dai, Xue Han, Fangjun Huo, Li Xie, Mei Yu, Yuru Wang, Ning An, Zhonghan Li, Weihua Guo) ownership.
2. Without the permission of the author, the content of this picture shall not be reproduced, otherwise it will be regarded as infringement.
3. Please indicate the source and original author when reprinting or quoting the content of this picture.
- 4 For those who do not abide by this statement or otherwise use the content of this picture illegally, the company and the author reserve the right to investigate according to law.

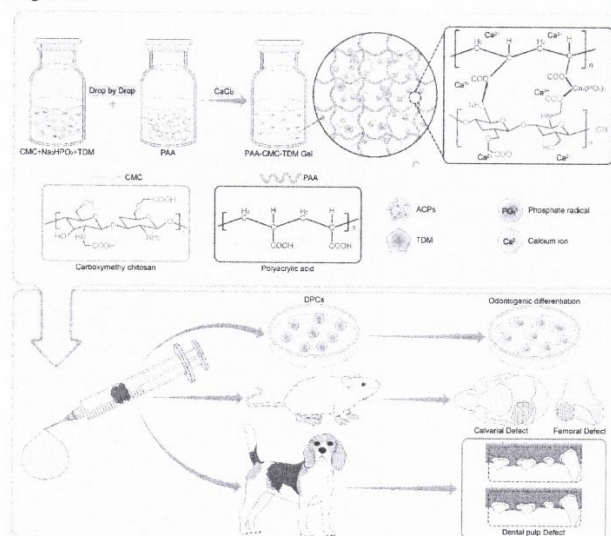

**Supplementary Figure 13** The Proof of copyright for the Figure 1.
